# Supplementary material for: Islet: Interpolation semi-Lagrangian element-based transport
Source: Copernicus journal article supplement (doi:10.5194/gmd-2021-296), 2021-09-27
Supplement: Supplementary file [file gmd-2021-296-AC4-supplement.pdf]

Dr. Kelly:

Thank you for your consideration of this manuscript. In separate letters, I have responded to the technical points and technical questions raised in RC1 and RC2. I like GMD and thus want to ask whether, after reading these letters, your opinion on the suitability of this article for possible publication in GMD has changed. If it has, I will prepare a new draft that is responsive to, in particular, the many excellent suggestions for clarification that reviewer 1 has provided. If it has not, then I will withdraw the article as you have suggested.

Thanks,  
Andrew Bradley
